# Supplementary material for: Differences in phytoplankton population vulnerability in response to chemical activity of mixtures
Source: Royal Society of Chemistry journal article supplement (doi:10.1039/d4em00249k), 2024-01-01
Supplement: d4em00249k1.pdf [file d4em00249k1.pdf]

## Electronic Supplementary Information (ESI)

### Differences in Phytoplankton Population Vulnerability to Chemical Activity of Mixtures

Talles Bruno Oliveira dos Anjos<sup>1</sup>, Quyen Nham<sup>2</sup>, Sebastian Abel<sup>1</sup>, Elin Lindehoff<sup>2</sup>, Clare Bradshaw<sup>3</sup>, Anna Sobek<sup>1</sup>

<sup>1</sup>Department of Environmental Science, Stockholm University, <sup>2</sup>Department of Biology and Environmental Science, Centre of Ecology and Evolution and Microbial Model Systems (EEMiS), Linnaeus University;

<sup>3</sup>Department of Ecology, Environment and Plant Sciences, Stockholm University

| <b>List of contents</b> |                                                                                                                     | <b>Page</b> |
|-------------------------|---------------------------------------------------------------------------------------------------------------------|-------------|
| <b>Table ESI 1</b>      | Results from LC-MS analysis of PAHs in the exposure medium/water                                                    | ESI-2       |
| <b>Table ESI 2</b>      | Quality control and assurance for GC-MS analysis of PAHs in biota                                                   | ESI-3       |
| <b>Table ESI 3</b>      | pH measured in the medium                                                                                           | ESI-3       |
| <b>Table ESI 4</b>      | Concentrations of Polycyclic Aromatic Hydrocarbons (PAHs) in Various Algal Species at Different Chemical Activities | ESI-4       |
| <b>Table ESI 5</b>      | Summary of the effects of chemical activity exerted by a PAH mixture on five phytoplankton species                  | ESI-5       |
| <b>Table ESI 6</b>      | Reduction in the Particulate Organic Carbon (POC)                                                                   | ESI-6       |
| <b>Table ESI 7</b>      | Principal Component Analysis summary of 441 lipid metabolites                                                       | ESI-7       |
| <b>Table ESI 8</b>      | Principal Component Analysis summary of 16 lipid classes                                                            | ESI-7       |
| <b>Table ESI 9</b>      | Principal Component Analysis summary of 23 methylated free fatty acids                                              | ESI-8       |
| <b>Table ESI 10</b>     | Principal Component Analysis summary of 23 trimethylated fatty acids                                                | ESI-8       |
| <b>Table ESI 11</b>     | Lipid composition responses of various phytoplankton species to different stressors found in literature             | ESI-9       |
| <b>Figure ESI 1</b>     | Growth of the algal cultures during the cultivation time (non-exposed)                                              | ESI-10      |
| <b>Figure ESI 2</b>     | Analysis of 441 lipids based on signal intensity (non-target method, mass and retention time)                       | ESI-11      |
| <b>Text ESI 1</b>       | Methodology and instrumentation overview for the lipidomic analysis                                                 | ESI-11      |
| <b>Text ESI 2</b>       | Algae toxicity test quality control                                                                                 | ESI-12      |
| <b>Text ESI 3</b>       | Analysis of PAH freely dissolved concentrations in the medium                                                       | ESI-12      |
| <b>Text ESI 4</b>       | Characterization of Lipid Profiles in Non-Exposed Algae Species                                                     | ESI-13      |
| <b>References</b>       |                                                                                                                     | ESI-14      |

**Table ESI 1: Results from LC-MS analysis of PAHs in the exposure medium/water**

| Species                            | PAHs freely dissolved concentrations and total chemical activity (mean $\pm$ s.d.) |                   |                     |                     |                         |
|------------------------------------|------------------------------------------------------------------------------------|-------------------|---------------------|---------------------|-------------------------|
|                                    | Acenaphthene (ng/L)                                                                | Fluorene (ng/L)   | Phenanthrene (ng/L) | Fluoranthene (ng/L) | Total chemical activity |
| <i>Prymnesium parvum</i>           | 44 ( $\pm$ 0.2)                                                                    | 36 ( $\pm$ 0.2)   | 20 ( $\pm$ 0.2)     | 4 ( $\pm$ 0.1)      | 0.02 ( $\pm$ 0.0002)    |
|                                    | 103 ( $\pm$ 0.2)                                                                   | 87 ( $\pm$ 0.4)   | 46 ( $\pm$ 0.2)     | 10 ( $\pm$ 0.2)     | 0.06 ( $\pm$ 0.0003)    |
|                                    | 174 ( $\pm$ 3.5)                                                                   | 148 ( $\pm$ 3.0)  | 77 ( $\pm$ 2.2)     | 16 ( $\pm$ 0.9)     | 0.09 ( $\pm$ 0.003)     |
|                                    | 356 ( $\pm$ 4.6)                                                                   | 309 ( $\pm$ 22.5) | 144 ( $\pm$ 10.5)   | 38 ( $\pm$ 5.5)     | 0.19 ( $\pm$ 0.015)     |
| <i>Phaeodactylum tricornerutum</i> | 43 ( $\pm$ 1.0)                                                                    | 34 ( $\pm$ 0.9)   | 20 ( $\pm$ 0.3)     | 4 ( $\pm$ 0.1)      | 0.02 ( $\pm$ 0.0004)    |
|                                    | 103 ( $\pm$ 0.7)                                                                   | 86 ( $\pm$ 0.5)   | 45 ( $\pm$ 0.5)     | 10 ( $\pm$ 0.3)     | 0.05 ( $\pm$ 0.0008)    |
|                                    | 169 ( $\pm$ 0.7)                                                                   | 144 ( $\pm$ 0.5)  | 76 ( $\pm$ 0.2)     | 17 ( $\pm$ 0.5)     | 0.09 ( $\pm$ 0.001)     |
|                                    | 339 ( $\pm$ 5.7)                                                                   | 280 ( $\pm$ 3.5)  | 130 ( $\pm$ 1.7)    | 32 ( $\pm$ 0.7)     | 0.17 ( $\pm$ 0.002)     |
| <i>Nannochloris</i> sp.            | 48 ( $\pm$ 0.4)                                                                    | 38 ( $\pm$ 0.2)   | 22 ( $\pm$ 0.4)     | 4 ( $\pm$ 0.1)      | 0.02 ( $\pm$ 0.0003)    |
|                                    | 110 ( $\pm$ 0.7)                                                                   | 92 ( $\pm$ 0.6)   | 48 ( $\pm$ 0.4)     | 10 ( $\pm$ 0.1)     | 0.06 ( $\pm$ 0.0004)    |
|                                    | 178 ( $\pm$ 1.0)                                                                   | 151 ( $\pm$ 0.5)  | 79 ( $\pm$ 0.3)     | 17 ( $\pm$ 0.2)     | 0.09 ( $\pm$ 0.001)     |
|                                    | 362 ( $\pm$ 2.7)                                                                   | 299 ( $\pm$ 3.1)  | 138 ( $\pm$ 1.4)    | 32 ( $\pm$ 0.8)     | 0.18 ( $\pm$ 0.002)     |
| <i>Monoraphidium minutum</i>       | 29 ( $\pm$ 3.2)                                                                    | 25 ( $\pm$ 1.3)   | 14 ( $\pm$ 0.7)     | 3 ( $\pm$ 0.2)      | 0.02 ( $\pm$ 0.002)     |
|                                    | 42 ( $\pm$ 0.7)                                                                    | 39 ( $\pm$ 15)    | 21 ( $\pm$ 7.7)     | 5 ( $\pm$ 1.8)      | 0.02 ( $\pm$ 0.009)     |
|                                    | 106 ( $\pm$ 28)                                                                    | 96 ( $\pm$ 21)    | 50 ( $\pm$ 12)      | 11 ( $\pm$ 2.8)     | 0.06 ( $\pm$ 0.014)     |
|                                    | 297 ( $\pm$ 65)                                                                    | 275 ( $\pm$ 25)   | 136 ( $\pm$ 1.2)    | 32 ( $\pm$ 0.4)     | 0.17 ( $\pm$ 0.011)     |
| <i>Rhodomonas salina</i>           | 17 ( $\pm$ 1.1)                                                                    | 16 ( $\pm$ 1.0)   | 9 ( $\pm$ 0.7)      | 1 ( $\pm$ 0.0)      | 0.01 ( $\pm$ 0.00)      |
|                                    | 133 ( $\pm$ 9.7)                                                                   | 114 ( $\pm$ 7.0)  | 64 ( $\pm$ 1.6)     | 14 ( $\pm$ 0.3)     | 0.07 ( $\pm$ 0.00)      |
|                                    | 145 ( $\pm$ 22)                                                                    | 126 ( $\pm$ 14)   | 74 ( $\pm$ 4.8)     | 17 ( $\pm$ 0.6)     | 0.09 ( $\pm$ 0.01)      |
|                                    | 258 ( $\pm$ 5.2)                                                                   | 218 ( $\pm$ 2.6)  | 124 ( $\pm$ 0.5)    | 28 ( $\pm$ 0.7)     | 0.15 ( $\pm$ 0.00)      |

**Quality control and assurance for LC-MS analysis of PAHs in the exposure medium/water**

| Analyte      | Blank | QC (mean $\pm$ st. dev.) | % RSD  |
|--------------|-------|--------------------------|--------|
| Acenaphthene | NF    | 5.8 $\pm$ 0.61 ng/L      | 10.623 |
| Fluorene     | NF    | 4.8 $\pm$ 0.29 ng/L      | 6.137  |
| Phenanthrene | NF    | 4.9 $\pm$ 0.07 ng/L      | 1.335  |
| Fluoranthene | NF    | 4.9 $\pm$ 0.04 ng/L      | 0.742  |

<sup>a</sup>Mean  $\pm$  standard deviation, n=3. NF = not found.

**Table ESI 2:** Quality control and assurance for GC-MS analysis of PAHs in biota

| Species                         | Analyte      | Recovery range (%) | Blank Level (ng) | LOD (ng)          | LOQ (ng)          |
|---------------------------------|--------------|--------------------|------------------|-------------------|-------------------|
| <i>Prymnesium parvum</i>        | Acenaphthene | 133 ± 46           | 0.08             | 0.47 <sup>a</sup> | 1.56 <sup>a</sup> |
|                                 | Fluorene     | 109 ± 22           | NF               | 0.49 <sup>a</sup> | 1.64 <sup>a</sup> |
|                                 | Phenanthrene | 120 ± 17           | NF               | 0.37 <sup>b</sup> | 0.69 <sup>b</sup> |
|                                 | Fluoranthene | 139 ± 23           | NF               | 0.62 <sup>b</sup> | 1.19 <sup>b</sup> |
| <i>Monorahidium minutum</i>     | Acenaphthene | 166 ± 73           | NF               | 0.47 <sup>a</sup> | 1.56 <sup>a</sup> |
|                                 | Fluorene     | 107 ± 18           | NF               | 0.49 <sup>a</sup> | 1.64 <sup>a</sup> |
|                                 | Phenanthrene | 114 ± 14           | NF               | 0.24 <sup>b</sup> | 0.37 <sup>b</sup> |
|                                 | Fluoranthene | 134 ± 22           | NF               | 0.49 <sup>b</sup> | 0.98 <sup>b</sup> |
| <i>Phaeodactylum tricorutum</i> | Acenaphthene | 117 ± 46           | 0.05             | 0.47 <sup>a</sup> | 1.56 <sup>a</sup> |
|                                 | Fluorene     | 84 ± 14            | NF               | 0.49 <sup>a</sup> | 1.64 <sup>a</sup> |
|                                 | Phenanthrene | 91 ± 9.7           | NF               | 0.36 <sup>b</sup> | 0.80 <sup>b</sup> |
|                                 | Fluoranthene | 111 ± 11           | NF               | 0.31 <sup>b</sup> | 0.47 <sup>b</sup> |
| <i>Nannochloris</i> sp.         | Acenaphthene | 147 ± 65           | NF               | 0.47 <sup>a</sup> | 1.56 <sup>a</sup> |
|                                 | Fluorene     | 107 ± 18           | NF               | 0.49 <sup>a</sup> | 1.64 <sup>a</sup> |
|                                 | Phenanthrene | 129 ± 8.6          | NF               | 0.23 <sup>b</sup> | 0.26 <sup>b</sup> |
|                                 | Fluoranthene | 152 ± 11           | NF               | 0.44 <sup>b</sup> | 0.59 <sup>b</sup> |

Not found (NF). Calibration curve (min – max): Acenaphthene: 0.152 – 192.7 ng; Fluorene: 0.152-192.7 ng; Phenanthrene: 0.154 – 185.7 ng; Fluoranthene: 0.137-188.3 ng; blank consists of solvent only.

<sup>a</sup>LOD and LOQ based on the method blank. Acenaphthene were found in 2 of 8 blanks, therefore the blank method was used. LOD = mean (blanks) + 3 x Std. Deviation (blanks); LOQ = mean (blanks) + 10 x Std. Deviation (blanks)

<sup>b</sup>LOD and LOQ based on the three lowest point of the calibration curve,

$$\text{LOD} = \frac{[ \text{mean (diff. between specified and calculated amounts)} ]}{\text{slope}} \times 3;$$

$$\text{LOQ} = \frac{[ \text{mean (diff. between specified and calculated amounts)} ]}{\text{slope}} \times 10$$

| Treatment       | <i>M. minutum</i>             | <i>P. parvum</i>             | <i>P. tricorutum</i>         | <i>Pichlorum</i> sp./ <i>Nannochloris</i> sp. |
|-----------------|-------------------------------|------------------------------|------------------------------|-----------------------------------------------|
| Control         | 10.17 (± 0.015) <sup>a</sup>  | 10.07 (± 0.049) <sup>a</sup> | 10.43 (± 0.043) <sup>a</sup> | 8.96 (± 0.053) <sup>a</sup>                   |
| Solvent Control | 10.39 (± 0.045) <sup>b</sup>  | 9.91 (± 0.070) <sup>a</sup>  | 10.46 (± 0.038) <sup>a</sup> | 9.09 (± 0.110) <sup>ab</sup>                  |
| 0.02            | 10.35 (± 0.094) <sup>b</sup>  | 9.86 (± 0.024) <sup>a</sup>  | 10.52 (± 0.060) <sup>a</sup> | 9.03 (± 0.019) <sup>ab</sup>                  |
| 0.06            | 10.30 (± 0.052) <sup>ab</sup> | 9.55 (± 0.0162) <sup>b</sup> | 10.49 (± 0.056) <sup>a</sup> | 8.93 (± 0.30) <sup>b</sup>                    |
| 0.09            | 10.18 (± 0.023) <sup>a</sup>  | 9.19 (± 0.049) <sup>c</sup>  | 10.48 (± 0.041) <sup>a</sup> | 8.90 (± 0.032) <sup>b</sup>                   |
| 0.17            | 8.87 (± 0.056) <sup>c</sup>   | 8.68 (± 0.195) <sup>d</sup>  | 9.66 (± 0.013) <sup>b</sup>  | 8.49 (± 0.003) <sup>c</sup>                   |

**Table ESI 3:** pH measured in the medium

Note: Differences between the treatments were assessed by one-way ANOVA. Different letters indicate significant differences (p<0.05) between treatments according to the Tukey's post-hoc test.

**Table ESI 4: Concentrations of Polycyclic Aromatic Hydrocarbons (PAHs) in Various Algal Species at Different Chemical Activities**

| Species                         | PAH Mixture       | Concentrations of PAHs in the organic carbon (mean $\pm$ s.d.) |                        |                            |                            |
|---------------------------------|-------------------|----------------------------------------------------------------|------------------------|----------------------------|----------------------------|
|                                 | Chemical activity | Acenaphthene<br>(mg/ Kg C)                                     | Fluorene<br>(mg/ Kg C) | Phenanthrene<br>(mg/ Kg C) | Fluoranthene<br>(mg/ Kg C) |
| <i>Prymnesium parvum</i>        | 0.02              | 272 ( $\pm$ 93)                                                | 364 ( $\pm$ 138)       | 472 ( $\pm$ 288)           | 224 ( $\pm$ 167)           |
|                                 | 0.06              | 285 ( $\pm$ 94)                                                | 372 ( $\pm$ 126)       | 349 ( $\pm$ 84)            | 122 ( $\pm$ 22)            |
|                                 | 0.1               | 2051 ( $\pm$ 710)                                              | 2362 ( $\pm$ 534)      | 1801 ( $\pm$ 125)          | 1036 ( $\pm$ 67)           |
|                                 | 0.18              | 4974 ( $\pm$ 1936)                                             | 5385 ( $\pm$ 1680)     | 3616 ( $\pm$ 727)          | 2958 ( $\pm$ 160)          |
| <i>Phaeodactylum tricorutum</i> | 0.02              | N/A                                                            | N/A                    | N/A                        | N/A                        |
|                                 | 0.06              | 548 ( $\pm$ 153)                                               | 784 ( $\pm$ 271)       | 999 ( $\pm$ 355)           | 1146 ( $\pm$ 292)          |
|                                 | 0.1               | 1660 ( $\pm$ 407)                                              | 2314 ( $\pm$ 304)      | 2736 ( $\pm$ 166)          | 2801 ( $\pm$ 170)          |
|                                 | 0.18              | 4818 ( $\pm$ 1204)                                             | 6708 ( $\pm$ 1371)     | 7429 ( $\pm$ 364)          | 7505 ( $\pm$ 26)           |
| <i>Nannochloris</i> sp.         | 0.02              | 1209 ( $\pm$ 173)                                              | 1307 ( $\pm$ 268)      | 1298 ( $\pm$ 230)          | 945 ( $\pm$ 159)           |
|                                 | 0.06              | 1340 ( $\pm$ 343)                                              | 1667 ( $\pm$ 332)      | 1740 ( $\pm$ 322)          | 1611 ( $\pm$ 241)          |
|                                 | 0.1               | 2620 ( $\pm$ 1764)                                             | 3164 ( $\pm$ 1692)     | 2761 ( $\pm$ 748)          | 2368 ( $\pm$ 484)          |
|                                 | 0.18              | 7151 ( $\pm$ 2086)                                             | 7504 ( $\pm$ 2102)     | 5080 ( $\pm$ 1344)         | 4367 ( $\pm$ 1711)         |
| <i>Monoraphidium minutum</i>    | 0.02              | 1010 ( $\pm$ 334)                                              | 1393 ( $\pm$ 548)      | 1741 ( $\pm$ 799)          | 1612 ( $\pm$ 880)          |
|                                 | 0.06              | 1460 ( $\pm$ 385)                                              | 2241 ( $\pm$ 383)      | 2755 ( $\pm$ 171)          | 2776 ( $\pm$ 80)           |
|                                 | 0.1               | 2454 ( $\pm$ 171)                                              | 3629 ( $\pm$ 171)      | 4354 ( $\pm$ 150)          | 4449 ( $\pm$ 236)          |
|                                 | 0.18              | 3778 ( $\pm$ 653)                                              | 5505 ( $\pm$ 724)      | 6149 ( $\pm$ 128)          | 7323 ( $\pm$ 589)          |
| <i>Rhodomonas salina</i>        | 0.01              | 345 ( $\pm$ 37)                                                | 444 ( $\pm$ 52)        | 446 ( $\pm$ 28)            | 318 ( $\pm$ 9)             |
|                                 | 0.08              | 4144 ( $\pm$ 235)                                              | 4740 ( $\pm$ 343)      | 3584 ( $\pm$ 288)          | 1166 ( $\pm$ 106)          |
|                                 | 0.1               | 3567 ( $\pm$ 247)                                              | 4452 ( $\pm$ 494)      | 3579 ( $\pm$ 303)          | 1179 ( $\pm$ 134)          |
|                                 | 0.13              | 5993 ( $\pm$ 640)                                              | 7523 ( $\pm$ 1293)     | 5676 ( $\pm$ 755)          | 2781 ( $\pm$ 289)          |

Not applicable (N/A)

**Table ESI 5:** Summary of the effects of the nominal<sup>a</sup> chemical activity exerted by a PAH mixture on five phytoplankton species.

| Treatment       | <i>Prymnesium parvum</i>     |                | <i>Monoraphidium minutum</i> |                |
|-----------------|------------------------------|----------------|------------------------------|----------------|
|                 | Growth rate. d <sup>-1</sup> | % inhibition   | Growth rate. d <sup>-1</sup> | % inhibition   |
| Control         | 0.529 (± 0.146)              | -              | 0.499 (± 0.061)              | -              |
| Solvent Control | 0.451 (± 0.137)              | -              | 0.691 (± 0.133)              | -              |
| 0.02            | 0.452 (± 0.023)              | -0.2 (± 5.12)  | 0.833 (± 0.086)              | -20.5 (± 12.5) |
| 0.05            | 0.320 (± 0.054)              | 29.5 (± 11.89) | 0.779 (± 0.027)              | -12.7 (± 3.9)  |
| 0.09            | - 0.134 (± 0.042)            | 129.8 (± 9.28) | 0.738 (± 0.084)              | -6.84 (± 12.2) |
| 0.17            | - 0.727 (± 0.122)            | 261 (± 27.11)  | 0.073 (± 0.034)              | 89.4 (± 4.90)  |

  

| Treatment       | <i>Nannochloris</i> sp.      |               | <i>Phaeodactylum tricornutum</i> |                 |
|-----------------|------------------------------|---------------|----------------------------------|-----------------|
|                 | Growth rate. d <sup>-1</sup> | % inhibition  | Growth rate. d <sup>-1</sup>     | % inhibition    |
| Control         | 0.428 (± 0.006)              | -             | 0.565 (± 0.188)                  | -               |
| Solvent Control | 0.493 (± 0.009)              | -             | 0.470 (± 0.052)                  | -               |
| 0.02            | 0.453 (± 0.016)              | 4.74 (± 3.40) | 0.527 (± 0.025)                  | - 8.81 (± 5.38) |
| 0.05            | 0.409 (± 0.012)              | 14.1 (± 2.53) | 0.527 (± 0.023)                  | - 8.72 (± 1.44) |
| 0.09            | 0.344 (± 0.004)              | 27.8 (± 0.86) | 0.416 (± 0.034)                  | 11.5 (± 7.17)   |
| 0.17            | 0.089 (± 0.039)              | 81.2 (± 8.16) | 0.281 (± 0.027)                  | 40.2 (± 5.76)   |

  

| Treatment       | <i>Rhodomonas salina</i>     |                |
|-----------------|------------------------------|----------------|
|                 | Growth rate. d <sup>-1</sup> | % inhibition   |
| Control         | 0.420 (± 0.017)              | -              |
| Solvent Control | 0.453 (± 0.024)              | -              |
| 0.01            | 0.422 (± 0.023)              | 6.86 (± 0.023) |
| 0.08            | 0.271 (± 0.007)              | 40.1 (± 1.57)  |
| 0.1             | 0.167 (± 0.017)              | 63.1 (± 3.72)  |
| 0.15            | - 0.139 (± 0.088)            | 130 (± 19.4)   |

Note: Growth rate and % of inhibition were generated from the cell density determined by flow cytometer (n=3), except for *Pichlorum* sp./*Nannochloris* sp. (n=3) and *R. salinas* (n=4), for which optical density was used. <sup>a</sup>True values are displayed in Table ESI 2.

**Table ESI 6:** Reduction in the Particulate Organic Carbon (POC) in five phytoplankton species exposed to a PAH mixture at different chemical activities<sup>a</sup>.

| Treatment       | <i>Prymnesium parvum</i> |              | <i>Monoraphidium minutum</i> |              |
|-----------------|--------------------------|--------------|------------------------------|--------------|
|                 | POC (µg/ml)              | % reduction  | POC (µg/ml)                  | % reduction  |
| Control         | 13.4 (± 0.9)             | -            | 18.1 (± 2.5)                 | -            |
| Solvent Control | 12.3 (± 2.9)             | -            | 20.0 (± 1.8)                 | -            |
| 0.02            | 12.7 (± 0.4)             | -3.5 (± 3.0) | 18.6 (± 1.8)                 | 6.91 (± 8.8) |
| 0.05            | 10.2 (± 1.1)             | 16.8 (± 8.6) | 19.0 (± 1.0)                 | 4.91 (± 5.0) |
| 0.09            | 6.2 (± 0.3)              | 49.2 (± 2.2) | 17.1 (± 1.4)                 | 14.5 (± 7.0) |
| 0.17            | 3.8 (± 0.1)              | 68.7 (± 0.7) | 6.6 (± 0.5)                  | 66.7 (± 2.3) |

  

| Treatment       | <i>Nannochloris</i> sp. |               | <i>Phaeodactylum tricornerutum</i> |              |
|-----------------|-------------------------|---------------|------------------------------------|--------------|
|                 | POC (µg/ml)             | % reduction   | POC (µg/ml)                        | % reduction  |
| Control         | 4.8 (± 0.6)             | -             | -                                  | -            |
| Solvent Control | 5.1 (± 0.4)             | -             | 28.0 (± 1.2)                       | -            |
| 0.02            | 3.6 (± 0.7)             | 29.2 (± 14.4) | -                                  | -            |
| 0.05            | 3.8 (± 0.2)             | 25.2 (± 4.1)  | 33.6 (± 6.9)                       | -20 (± 24.7) |
| 0.09            | 3.5 (± 0.7)             | 32.0 (± 14.0) | 24.3 (± 0.7)                       | 13.1 (± 2.7) |
| 0.17            | 2.4 (± 1.3)             | 52.2 (± 25.5) | 14.3 (± 1.0)                       | 48.8 (± 3.5) |

  

| Treatment       | <i>Rhodomonas salina</i> |             |
|-----------------|--------------------------|-------------|
|                 | POC (µg/ml)              | % reduction |
| Control         | -                        | -           |
| Solvent Control | 17.5 (± 0.7)             | -           |
| 0.01            | 17.5 (± 0.8)             | 0 (± 4.4)   |
| 0.08            | 13.9 (± 0.4)             | 20 (± 2.3)  |
| 0.1             | 13.7 (± 0.9)             | 21 (± 5.1)  |
| 0.15            | 6.2 (± 6.2)              | 64 (± 3.0)  |

Note: The reduction in the POC content relative to the solvent control on day 3 of exposure.

<sup>a</sup>True values are displayed in Table ESI 2.

**Table ESI 7:** Principal Component Analysis summary of 441 lipid metabolites

| <b>Table Analyzed</b>             | <b>441 Metabolites</b> |          |          |        |
|-----------------------------------|------------------------|----------|----------|--------|
| PC summary                        | PC1                    | PC2      | PC3      | PC4    |
| Eigenvalue                        | 203.3                  | 121.5    | 56.31    | 31.98  |
| Proportion of variance            | 46.10%                 | 27.55%   | 12.77%   | 7.25%  |
| Cumulative proportion of variance | 46.10%                 | 73.65%   | 86.42%   | 93.67% |
| Component selection               | Selected               | Selected | Selected |        |
| Data summary                      |                        |          |          |        |
| Total number of variables         | 441                    |          |          |        |
| Total number of components        | 14                     |          |          |        |
| Component selection method        | Parallel analysis      |          |          |        |
| Random seed                       | 775065250              |          |          |        |
| Number of simulations             | 1000                   |          |          |        |
| Number of selected components     | 3                      |          |          |        |
| Rows in table                     | 15                     |          |          |        |
| Rows skipped (missing data)       | 0                      |          |          |        |
| Rows analyzed (# cases)           | 15                     |          |          |        |

**Table ESI 8:** Principal Component Analysis summary of 16 lipid classes

| <b>Table Analyzed</b>             | <b>Lipid classes</b> |          |        |        |
|-----------------------------------|----------------------|----------|--------|--------|
| PC summary                        | PC1                  | PC2      | PC3    | PC4    |
| Eigenvalue                        | 8.964                | 3.576    | 2.508  | 0.5542 |
| Proportion of variance            | 56.02%               | 22.35%   | 15.68% | 3.46%  |
| Cumulative proportion of variance | 56.02%               | 78.37%   | 94.05% | 97.51% |
| Component selection               | Selected             | Selected |        |        |
| Data summary                      |                      |          |        |        |
| Total number of variables         | 16                   |          |        |        |
| Total number of components        | 14                   |          |        |        |
| Component selection method        | Parallel analysis    |          |        |        |
| Random seed                       | 775033203            |          |        |        |
| Number of simulations             | 1000                 |          |        |        |
| Number of selected components     | 2                    |          |        |        |
| Rows in table                     | 15                   |          |        |        |
| Rows skipped (missing data)       | 0                    |          |        |        |
| Rows analyzed (# cases)           | 15                   |          |        |        |

**Table ESI 9: Principal Component Analysis summary of 23 methylated free fatty acids**

| <b>Table Analyzed</b>             | <b>Met FA</b>                                                       |          |        |        |
|-----------------------------------|---------------------------------------------------------------------|----------|--------|--------|
| PC summary                        | PC1                                                                 | PC2      | PC3    | PC4    |
| Eigenvalue                        | 13.52                                                               | 4.360    | 3.734  | 0.6921 |
| Proportion of variance            | 58.76%                                                              | 18.96%   | 16.24% | 3.01%  |
| Cumulative proportion of variance | 58.76%                                                              | 77.72%   | 93.95% | 96.96% |
| Component selection               | Selected                                                            | Selected |        |        |
| <b>Data summary</b>               |                                                                     |          |        |        |
| Total number of variables         | 23                                                                  |          |        |        |
| Total number of components        | 14                                                                  |          |        |        |
| Component selection method        | PCs that together explain this percent of the total variance: 75.00 |          |        |        |
| Number of selected components     | 2                                                                   |          |        |        |
| Rows in table                     | 15                                                                  |          |        |        |
| Rows skipped (missing data)       | 0                                                                   |          |        |        |
| Rows analyzed (# cases)           | 15                                                                  |          |        |        |

**Table ESI 10: Principal Component Analysis summary of 23 trimethylated fatty acids**

| <b>Table Analyzed</b>             | <b>Trans FA</b>   |          |        |        |
|-----------------------------------|-------------------|----------|--------|--------|
| PC summary                        | PC1               | PC2      | PC3    | PC4    |
| Eigenvalue                        | 8.947             | 3.611    | 2.479  | 0.7543 |
| Proportion of variance            | 55.92%            | 22.57%   | 15.49% | 4.71%  |
| Cumulative proportion of variance | 55.92%            | 78.49%   | 93.98% | 98.70% |
| Component selection               | Selected          | Selected |        |        |
| <b>Data summary</b>               |                   |          |        |        |
| Total number of variables         | 16                |          |        |        |
| Total number of components        | 14                |          |        |        |
| Component selection method        | Parallel analysis |          |        |        |
| Random seed                       | 775053375         |          |        |        |
| Number of simulations             | 1000              |          |        |        |
| Number of selected components     | 2                 |          |        |        |
| Rows in table                     | 15                |          |        |        |
| Rows skipped (missing data)       | 0                 |          |        |        |
| Rows analyzed (# cases)           | 15                |          |        |        |



**Table ESI 11:** Lipid composition responses of various phytoplankton species to different stressors found in literature

|                                            | <b>Organism</b>                           | <b>Effect</b>                                                             | <b>stressor</b>                                           | <b>Reference</b> |
|--------------------------------------------|-------------------------------------------|---------------------------------------------------------------------------|-----------------------------------------------------------|------------------|
| <b>glycerol-3-phosphate</b>                | <i>R. subcapitata</i>                     | High contribution SIMPER                                                  | $\gamma$ -radiation                                       | 1                |
|                                            | microalgae                                | eicosapentaenoic acid (EPA) $\uparrow$<br>Linoleic acid $\uparrow$        | pesticides                                                | 2                |
| <b>Polyunsaturated fatty acids (PUFAS)</b> | <i>R. subcapitata</i>                     | High contribution SIMPER<br>18:2 (n-6) Linoleic acid<br>18:0 Stearic acid | $\gamma$ -radiation                                       | 1                |
|                                            | <i>Chlorella</i> sp.                      | 18:0 Stearic acid<br>(High abundance)                                     | waste water                                               | 3                |
|                                            | <i>Nannochloropsis oculata</i>            | 18:2 Linoleic acid $\uparrow$<br>C18:1 Oleic acid $\uparrow$              | nitrogen limitation                                       | 4                |
|                                            | <i>Chlorella</i> sp.                      | C 18:1 Oleic acid<br>C 18:2 Linoleic acid<br>C 18:3<br>(high abundance)   | waste water                                               | 3                |
|                                            | <i>Nannochloropsis oculata</i>            | C 20:5 $\downarrow$                                                       | nitrogen limitation                                       | 4                |
|                                            | microalgae                                | PUFA Decrease $\downarrow$                                                | heavy metals                                              | 5                |
|                                            | <b>Monounsaturated fatty acids (MUFA)</b> | microalgae                                                                | 16:1 Palmitoleic acid $\uparrow$<br>Oleic acid $\uparrow$ | pesticides       |
| <i>Thalassiosira pseudonata</i>            |                                           | C16:1 Palmitoleic acid $\uparrow$                                         | PCBs                                                      | 6                |
| <i>Nannochloropsis</i> sp.                 |                                           | C16:1 Palmitoleic acid $\uparrow$                                         | nitrogen limitation                                       | 7,8              |
| <i>Chlorella</i> sp.                       |                                           | C16:1 Palmitoleic acid<br>(high abundance)                                | waste water                                               | 3                |

**Table ESI 11:** Lipid composition responses of various phytoplankton species to different stressors found in literature (continuation)

|                                     | Organism                        | Effect                               | stressor            | Reference |
|-------------------------------------|---------------------------------|--------------------------------------|---------------------|-----------|
| <b>Saturated fatty acids (SFAs)</b> | microalgae                      | SFA Increase ↑                       | heavy metals        | 5         |
|                                     | <i>Thalassiosira pseudonata</i> | Palmitic acid C16:0 ↑                | PCBs                | 6         |
|                                     | <i>N. oculata</i>               | Palmitic acid C16:0 ↑                | nitrogen limitation | 4         |
|                                     | <i>Chlorella sp.</i>            | Palmitic acid C16:0 (high abundance) | waste water         | 3         |
|                                     | <i>Nannochloropsis sp</i>       | Palmitic acid C16:0 ↑                | nitrogen limitation | 7,8       |

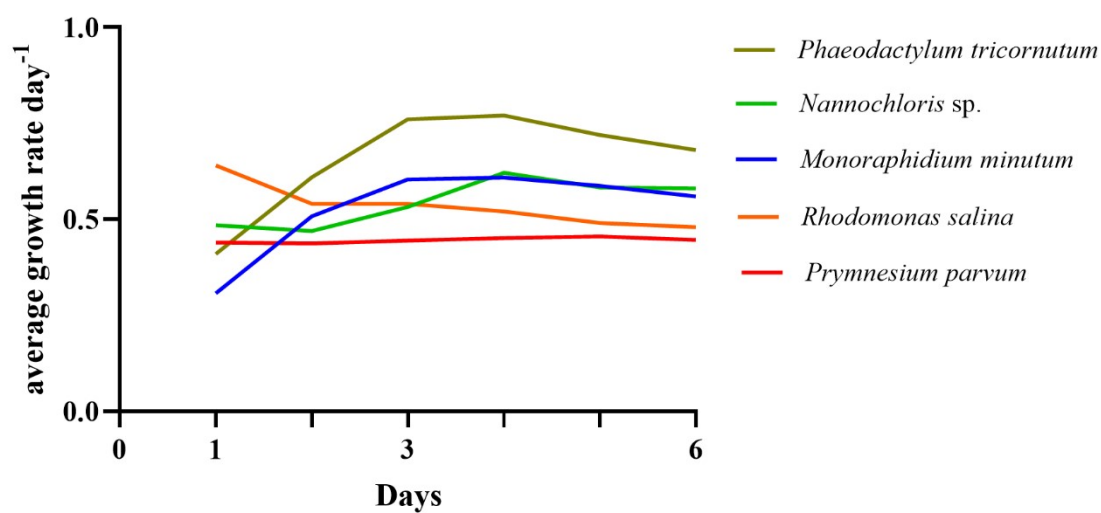

**Figure ESI 1:** Growth of the algal cultures during the cultivation time (non-exposed)

## Lipidomics

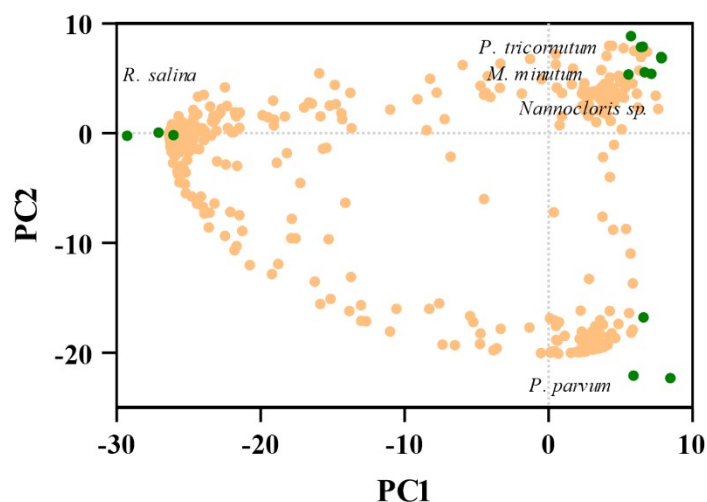

**Figure ESI 2:** Analysis of 441 lipids based on signal intensity (non-target method, mass and retention time) PC1 + PC2 = 65.3 % of variance. PC scores are represented by orange dots associated to the lipids. Loadings are represented by green dots and are associated to the species (n=3).

### Text ESI 1: Methodology and instrumentation overview for the lipidomic analysis

The lipid extraction process involved a chloroform: methanol (2:1) phase extraction, with the chloroform phase (extract) stored at  $-80^{\circ}\text{C}$  until LC-MS analysis, following the Folch extraction method. The extraction mix included four internal standards (IS): 13C3-TG (16:0/16:0/16:0) (Larodan, Solna, Sweden); D30-Cer (d18:1/16:0), D70-PC (18:0/18:0), D5-DG (18:0/0:0/18:0) (Avanti polar Lipids, Birmingham; AL, USA) added in identical concentrations to all samples before extraction. Additionally, a quality control (QC) sample, a mix of extracts from all samples, and a dilution series of QC were prepared. For UHPLC-QTOF/MS analysis, a 1290 Infinity UHPLC (Agilent) with a plasma lipid-optimized gradient and an Acquity UPLC CSH 2.1x50 1.7 $\mu\text{m}$  C18 column (Waters) were utilized. The QTOF 6546 instrument ("ODIN") (Agilent) employed electrospray ionization in both positive and negative modes. The batch underwent an initial run in positive mode, followed by switching to negative mode. Major peaks in the QC sample underwent additional sample injections with two different collision energies (25V and 40V). Software ProFinder 10.0 (Agilent MassHunter) facilitated batch targeted feature extractions, referencing internal databases for various lipid classes. MSMS analysis with Agilent Mass Hunter Qualitative Analysis 10.0 aimed to verify major lipid

classes in the samples, with preliminary identity suggestions based on searches against SMC databases. Lipids were annotated with lipid class and total carbon and double bond counts. For the fatty acid analysis, samples underwent methylation for free fatty acids and transmethylation for bound fatty acids.

### **Text ESI 2: Algae toxicity test quality control**

The pH increased during the exposure, from the starting pH of 8, to a maximum of 10.52 (*P. tricorutum*; 0.02) and a minimum of 8.49 (*Pichlorum* sp./*Nannochloris* sp.; 0.17) (Table ESI 1). All algae species displayed exponential growth in the control across all tests, with specific growth ranging from 0.42 d<sup>-1</sup> for *R. salinas* to 0.56 d<sup>-1</sup> *P. tricorutum* (Table 1). We investigated the effect of the silicone (PDMS) loaded only with methanol on the growth rate and found that *Pichlorum* sp./*Nannochloris* sp. and *M. minutum* show increase in growth in the presence of the PDMS (Table 1). Previous studies have reported a growth-promoting effect of silicone, although this effect was considered negligible.<sup>9,10</sup>

### **Text ESI 3: Analysis of PAH freely dissolved concentrations in the medium**

PAH determination in equilibrated Milli-Q water samples was carried out on a high-performance liquid chromatograph coupled to a photodiode array detector (HPLC-PDA, Shimadzu i-Series LC 2040C 3D, Shimadzu, Sweden). The samples were analyzed directly after vortexing, with an injection volume of 50 µL. Chromatographic separation was achieved on a HALO 90 Å PAH column (particle size of 2.7 µm, 2.1 x 50 mm, HALO, USA). The mobile phases consisted of Milli-Q water (A) and acetonitrile (B). The gradient started with 50% B. Starting from 0.31 min the gradient was linearly ramped first to 70% B until 5.0 min then to 99% B until 5.2 min and maintained for 1.3 min, followed by a linear decrease back to 50% B within 0.1 min and maintained for another 1.2 min. The total run time was 8 min. Throughout the whole separation the flow rate was 0.5 mL/min, the sample compartment temperature was 15 °C, and the column temperature was 30 °C. PDA detection wavelength was set at 225 nm, 234 nm, 249 nm, and 261 nm for measuring acenaphthene, fluoranthene, phenanthrene, and fluorine, respectively, with bandwidth of +/- 4 nm. Quantification was carried out using an external calibration curve prepared with the 4 PAH analytes at 8 concentration points in a range of 1-1000 µg/L. PAHs solubilities in water were also adjusted to 17°C, by extrapolating the solubility-temperature correlation based on Wauchope et al., (1972)<sup>11</sup> and the adjusted solubility was applied in the equation (1) to obtain the adjusted subcooled liquid solubility.

#### Text ESI 4: Characterization of Lipid Profiles in Non-Exposed Algae Species

The lipidomic analysis identified 441 lipids from samples of non-exposed algae (Figure 4), demonstrating good reproducibility of internal standards across samples. The lipid profile in *P. parvum* was predominantly influenced by the polar lipids such as DGCC (di-galactoyl-diacylglycerol) and PG (phosphatidylglycerol) (Figure 4-B). According to Lowenstein et al., (2021)<sup>12</sup>, the high abundance of DGCC in *P. parvum* is a shared characteristic with other haptophytes in coastal areas, reflecting the ecological niche and regional macronutrient availability. Compared to the other species, *P. parvum* exhibits notable richness in free fatty acids, comprising a diverse profile of more than ten distinct fatty acids (Figure 4-C, Table ESI 7). Free fatty acids are often indicative of the immediate availability of substrate for energy production or other metabolic processes, for example production of toxins. Renowned for its importance in harmful algal blooms, *P. parvum* has been associated with the production of toxins identified as fatty acid amides.<sup>13</sup> Although our analysis did not achieve a comparable level of identification for these amide fatty acids, several fatty acids identified in *P. parvum*, such as palmitic acid (C16:0), stearic acid (C 18:0), oleic acid (C18:1  $\omega$ -9), linoleic acid (C 18:2  $\omega$ -6), can exist with an amine group (-NH<sub>2</sub>).

*R. salina* exhibited high relative levels of DGTS (diacyl-glycerol-trimethyl-hermoserine), which is a type of glycerolipid belonging to the phospholipid group along with PM (phosphatidylmethanol), PS (phosphatidylserine), and PE (phosphatidylethanol) (Figure 1-B). These lipids contribute to the structural integrity of cell membranes. Additionally, *R. salina* showed elevated levels of TG (triacylglyceride), one of the major forms of neutral lipids for energy storage in organisms. *R. salina* displays high diversity in terms of bound fatty acids compared to the other species (Figure 4-D, Table ESI 8), with few free fatty acids (C 17:1  $\omega$ -7, C 17:0, C:17:0, C:18:0) appearing in high abundance (Figure 4-C). Bound fatty acids are typically associated with structural lipids like phospholipids and glycolipids and their abundance might reflect the cells long-term adaptive strategy for lipid storage and membrane composition.<sup>14</sup> Upon closer analysis of the structures of both free and bound fatty acids in *P. parvum* and *R. salina*, the chemical formula indicates chloroplast diol fatty acids such as palmitic acid (C16:0), stearic acid (C 18:0), oleic acid (C18:1  $\omega$ -9), linoleic acid (C 18:2  $\omega$ -6) and alpha-linoleic acid (C18:3  $\omega$ -3). These plastid fatty acids are essential components of the thylakoid membranes where the photosynthetic process takes place. Additionally, they can serve as precursors for signaling molecules and contribute to the organism response to environmental stress.<sup>15</sup>

## References

1. Golz AL, Bradshaw C. Gamma radiation induced changes in the biochemical composition of aquatic primary producers and their effect on grazers. *Front Environ Sci.* 2019;7(JUL):451867. doi:10.3389/FENVS.2019.00100/BIBTEX
2. Filimonova V, Gonçalves F, Marques JC, De Troch M, Gonçalves AMM. Fatty acid profiling as bioindicator of chemical stress in marine organisms: A review. *Ecol Indic.* 2016;67:657-672. doi:10.1016/J.ECOLIND.2016.03.044
3. Nzayisenga JC, Farge X, Groll SL, Sellstedt A. Effects of light intensity on growth and lipid production in microalgae grown in wastewater. *Biotechnol Biofuels.* 2020;13(1):1-8. doi:10.1186/S13068-019-1646-X/FIGURES/5
4. Olofsson M, Lamela T, Nilsson E, et al. Combined Effects of Nitrogen Concentration and Seasonal Changes on the Production of Lipids in *Nannochloropsis oculata*. *Marine Drugs* 2014, Vol 12, Pages 1891-1910. 2014;12(4):1891-1910. doi:10.3390/MD12041891
5. Rocchetta I, Mazzuca M, Conforti V, Ruiz L, Balzaretto V, De Molina MDCR. Effect of chromium on the fatty acid composition of two strains of *Euglena gracilis*. *Environmental Pollution.* 2006;141(2):353-358. doi:10.1016/J.ENVPOL.2005.08.035
6. Fisher NS, Schwarzenbach RP. FATTY ACID DYNAMICS IN THALASSIOSIRA PSEUDONANA (BACILLARIOPHYCEAE): IMPLICATIONS FOR PHYSIOLOGICAL ECOLOGY. *J Phycol.* 1978;14(2):143-150. doi:10.1111/J.1529-8817.1978.TB02439.X
7. Sukenik A, Carmeli Y. LIPID SYNTHESIS AND FATTY ACID COMPOSITION IN NANNOCHLOROPSIS SP. (EUSTIGMATOPHYCEAE) GROWN IN A LIGHT-DARK CYCLE1. *J Phycol.* 1990;26(3):463-469. doi:10.1111/J.0022-3646.1990.00463.X
8. Sukenik A, Carmeli Y, Berner T. REGULATION OF FATTY ACID COMPOSITION BY IRRADIANCE LEVEL IN THE EUSTIGMATOPHYTE NANNOCHLOROPSIS SP.1. *J Phycol.* 1989;25(4):686-692. doi:10.1111/J.0022-3646.1989.00686.X
9. Kreutzer A, Faetsch S, Heise S, Hollert H, Witt G. Passive dosing: Assessing the toxicity of individual PAHs and recreated mixtures to the microalgae *Raphidocelis subcapitata*. *Aquatic Toxicology.* 2022;249:106220. doi:10.1016/j.aquatox.2022.106220
10. Niehus NC, Floeter C, Hollert H, Witt G. Miniaturised Marine Algae Test with Polycyclic Aromatic Hydrocarbons – Comparing Equilibrium Passive Dosing and Nominal Spiking. *Aquatic Toxicology.* 2018;198:190-197. doi:10.1016/j.aquatox.2018.03.002
11. Wauchope RD, Getzen FW. Temperature Dependence of Solubilities in Water and Heats of Fusion of Solid Aromatic Hydrocarbons. *J Chem Eng Data.* 1972;17(1):38-41. doi:10.1021/JE60052A020
12. Lowenstein DP, Mayers K, Fredricks HF, Van Mooy BAS. Targeted and untargeted lipidomic analysis of haptophyte cultures reveals novel and divergent nutrient-stress adaptations. *Org Geochem.* 2021;161:104315. doi:10.1016/J.ORGGEOCHEM.2021.104315
13. Bertin MJ, Zimba P V., Beauchesne KR, Huncik KM, Moeller PDR. Identification of toxic fatty acid amides isolated from the harmful alga *Prymnesium parvum carter*. *Harmful Algae.* 2012;20:111-116. doi:10.1016/J.HAL.2012.08.005
14. De Carvalho CCCR, Caramujo MJ. The Various Roles of Fatty Acids. *Molecules* 2018, Vol 23, Page 2583. 2018;23(10):2583. doi:10.3390/MOLECULES23102583

15. Li J, Liu LN, Meng Q, Fan H, Sui N. The roles of chloroplast membrane lipids in abiotic stress responses. *Plant Signal Behav.* 2020;15(11). doi:10.1080/15592324.2020.1807152
