# Supplementary figures and images for: Differences in phytoplankton population vulnerability in response to chemical activity of mixtures
Source: Royal Society of Chemistry journal article supplement (doi:10.1039/d4em00249k), 2024-01-01

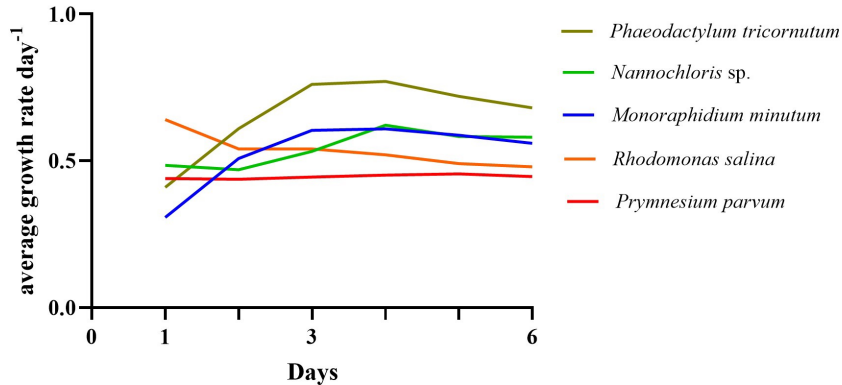

Supplement: d4em00249k2.pdf [file d4em00249k2.pdf]

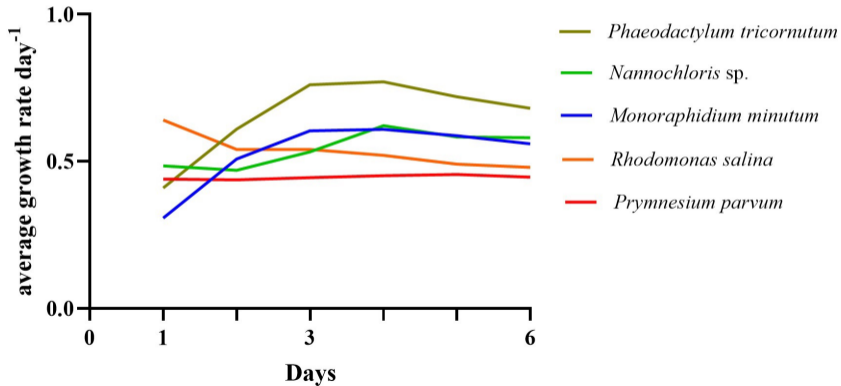

Supplement: d4em00249k2.pdf [file d4em00249k2.pdf]

## Lipidomics

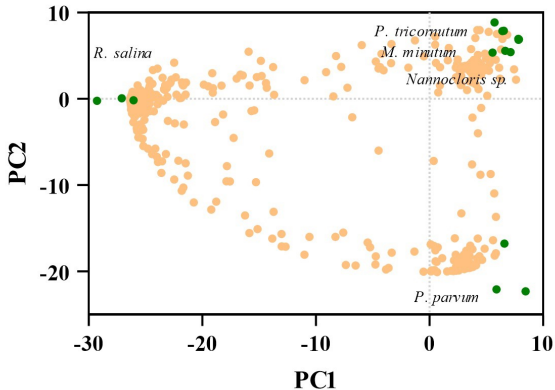

Supplement: d4em00249k3.pdf [file d4em00249k3.pdf]
